# Supplementary material for: IL-17B alleviates the pathogenesis of systemic lupus erythematosus by inhibiting FASN-mediated differentiation of B cells
Source: PubMed Central journal article supplement (PMC11457847; doi:10.1172/jci.insight.181906), 2024-08-08

Full unedited gel for  
Figure 3F

| R848 (min)           | 0 | 30 | 60 | 0 | 30 | 60 |
|----------------------|---|----|----|---|----|----|
| IL-17B<br>(200ng/ml) | - | -  | -  | + | +  | +  |

$\beta$ -actin

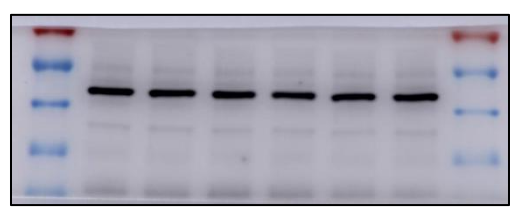

t-Erk

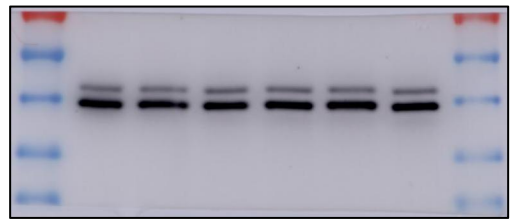

p-Erk

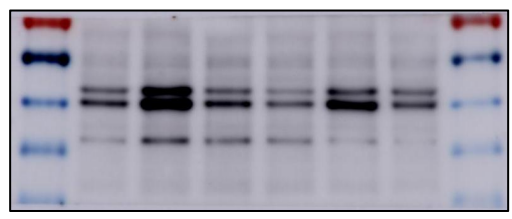

t-JNK

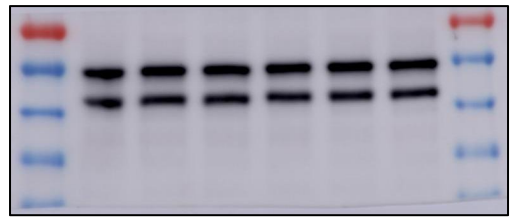

p-JNK

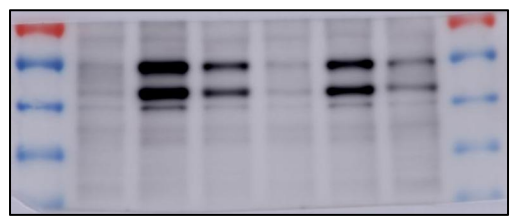

t-p38

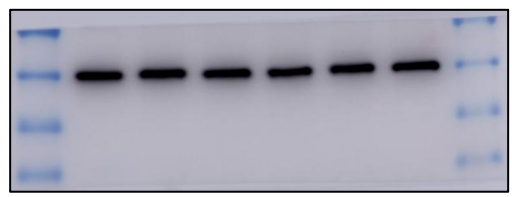

p-p38

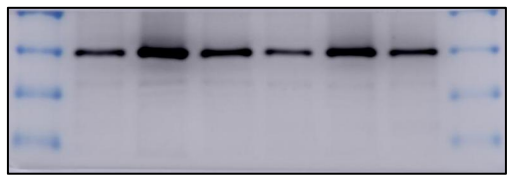

t-p65

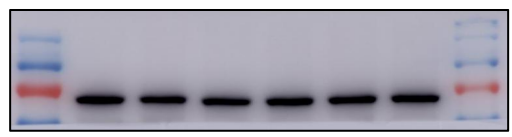

p-p65

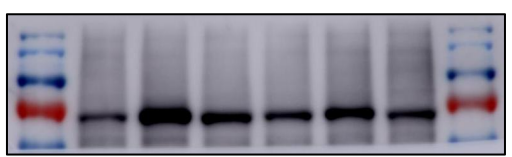

Full unedited gel for  
Figure 4E

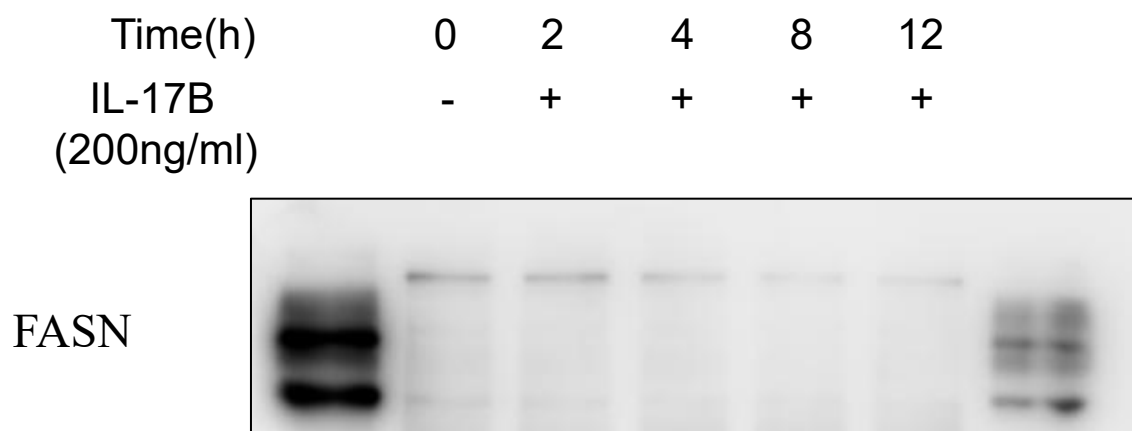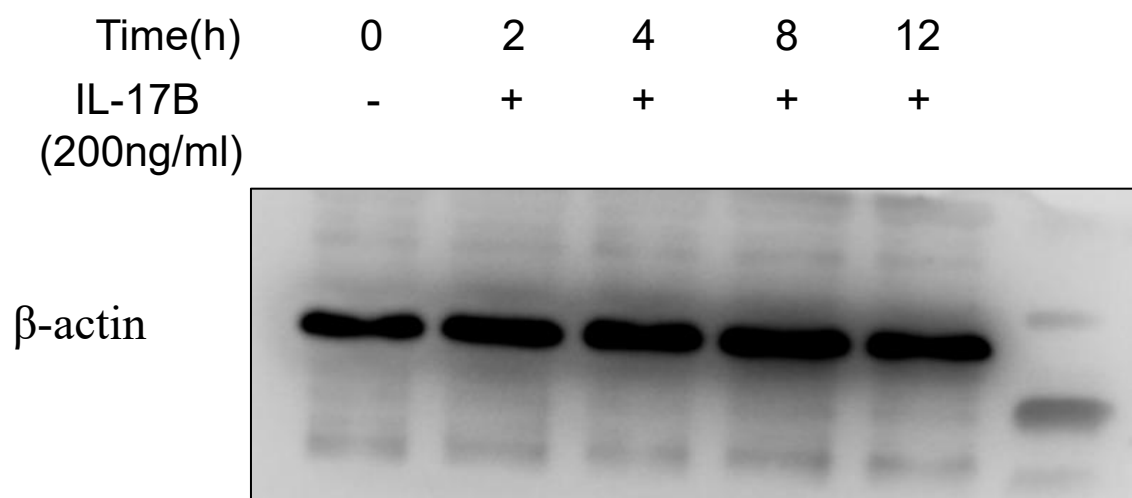

Full unedited gel  
for Figure 4M

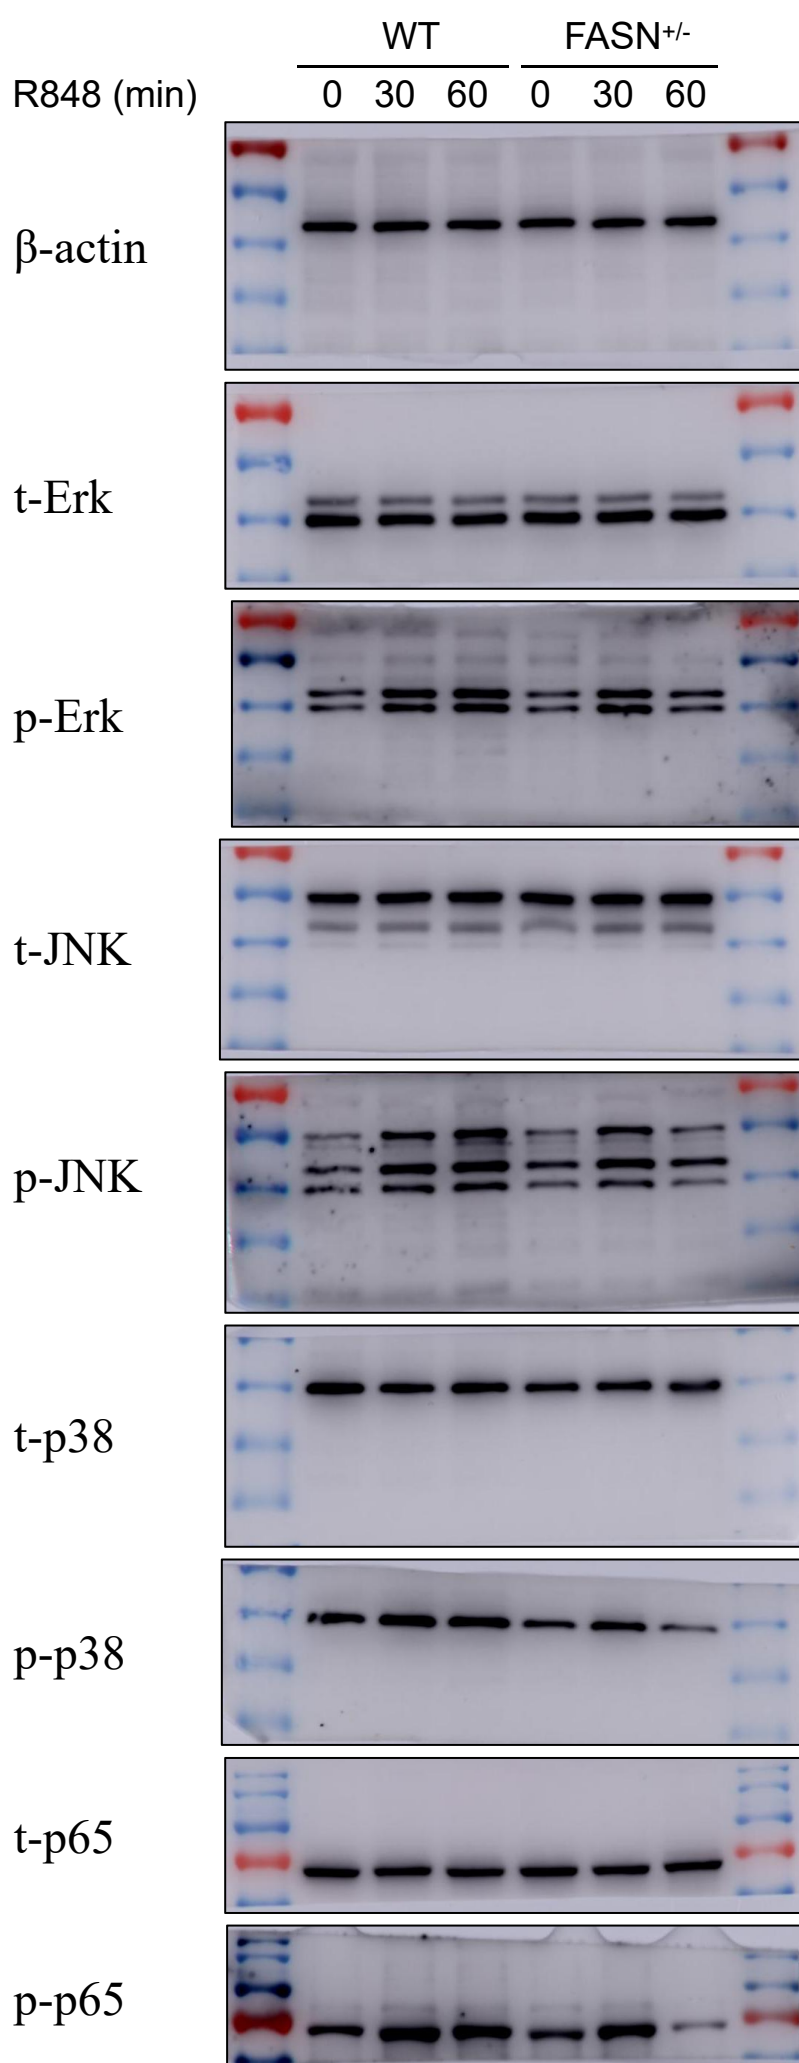

Full unedited gel for  
supplementary Figure 10D

R848 (min)  
TVB-2640  
(40 $\mu$ M)

0 30 60 0 30 60  
- - - + + +

$\beta$ -actin

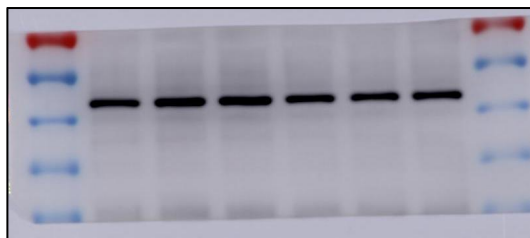

t-Erk

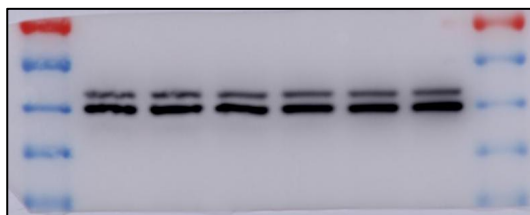

p-Erk

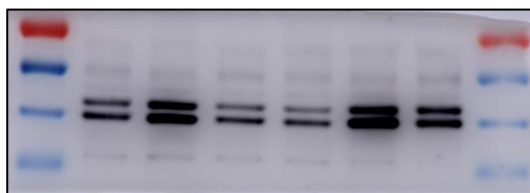

t-JNK

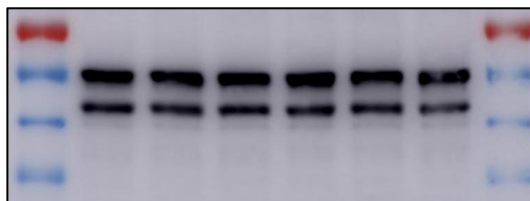

p-JNK

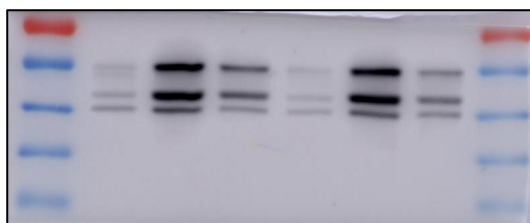

t-p38

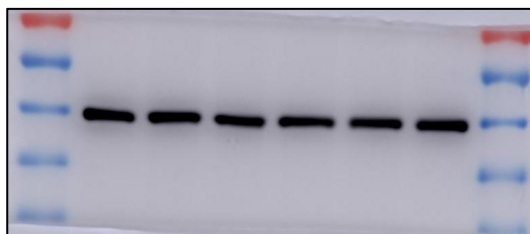

p-p38

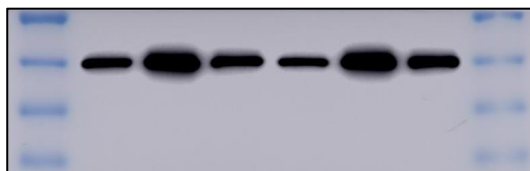

t-p65

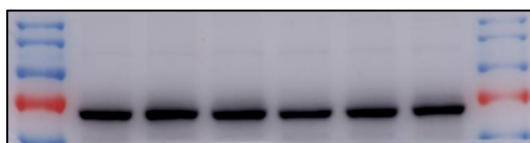

p-p65

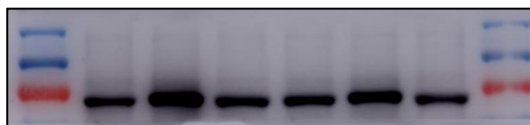

Full unedited gel for  
supplementary Figure 11D

| R848 (min)          | 0 | 30 | 60 | 0 | 30 | 60 |
|---------------------|---|----|----|---|----|----|
| Oligomylin (1µg/ml) | - | -  | -  | + | +  | +  |

β-actin

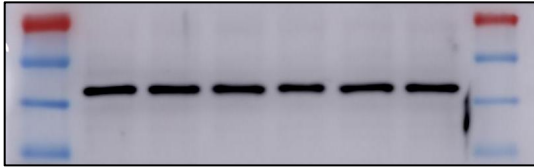

t-Erk

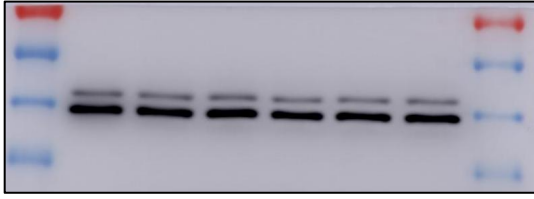

p-Erk

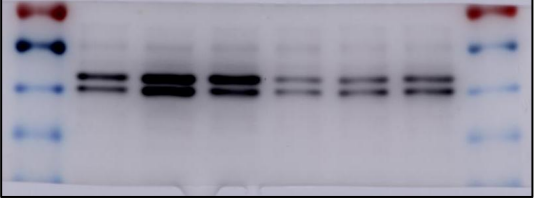

t-JNK

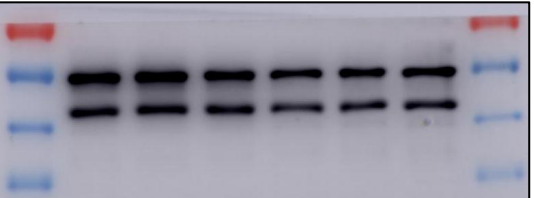

p-JNK

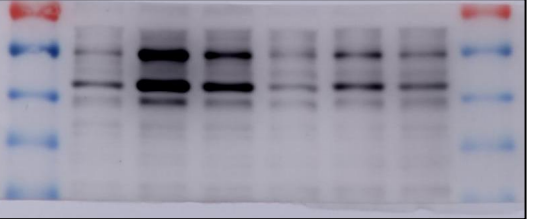

t-p38

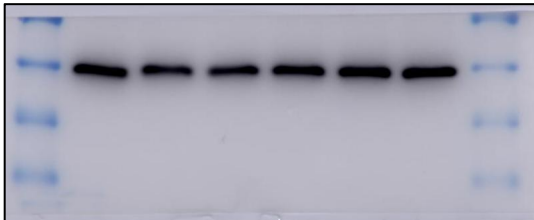

p-p38

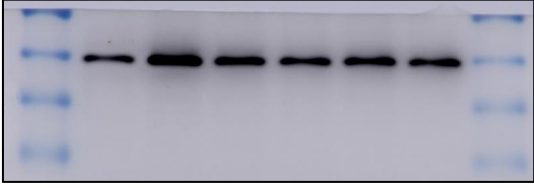

t-p65

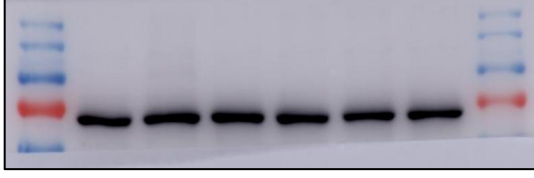

p-p65

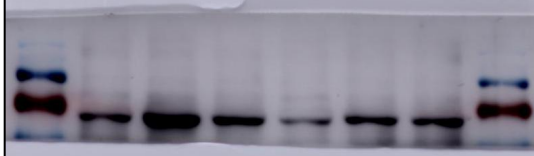

Supplement: jciinsight-9-181906-s092.pdf [file jciinsight-9-181906-s092.pdf]
