# Supplementary material for: IL-17B alleviates the pathogenesis of systemic lupus erythematosus by inhibiting FASN-mediated differentiation of B cells
Source: PubMed Central journal article supplement (PMC11457847; doi:10.1172/jci.insight.181906), 2024-08-08
Supplement: jciinsight-9-181906-s091.pdf [file jciinsight-9-181906-s091.pdf]

## Supplemental Data

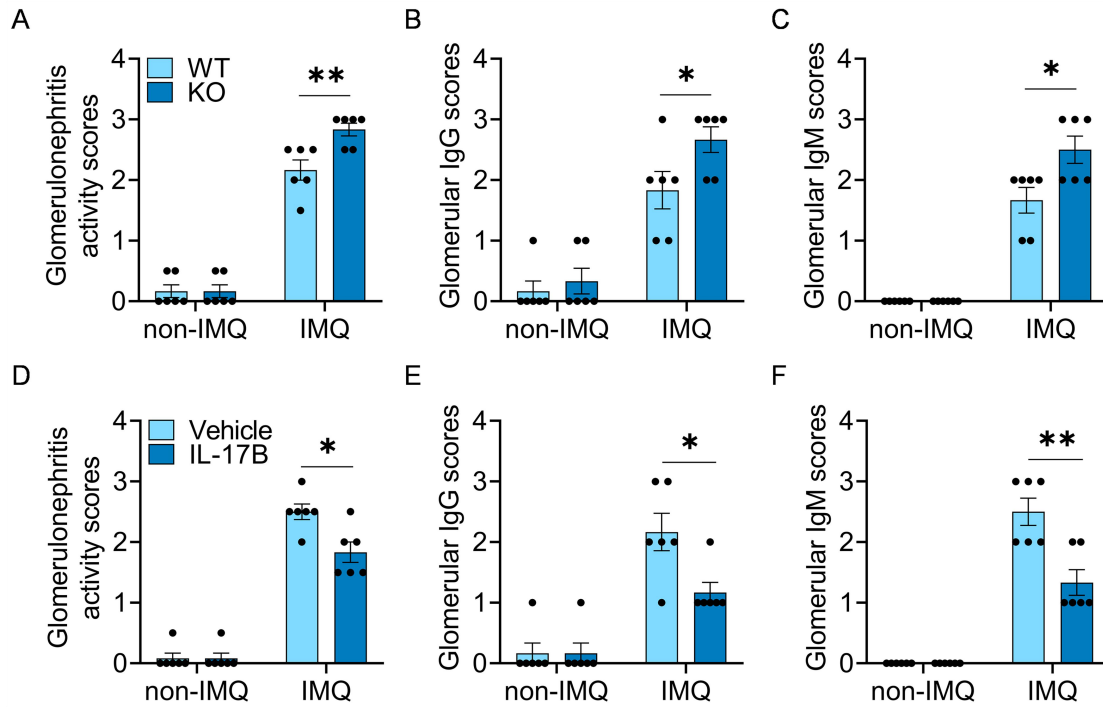

**Supplemental Figure 1. IL-17B alleviate the pathological damage to the kidneys induced by IMQ in mice.** (A) Glomerulonephritis activity scores, (B) glomerular IgG scores and (C) glomerular IgM scores in wild-type or *IL-17B* KO mice treated with IMQ. (D) Glomerulonephritis activity scores, (E) glomerular IgG scores and (F) glomerular IgM scores in IMQ-induced wild-type mice treated with vehicle or rmIL-17B. The data are shown as the means  $\pm$  SEM and are representative of three independent experiments (n=6 mice/group). \* $p < 0.05$ , \*\* $p < 0.01$ , and as determined by two-way ANOVA.

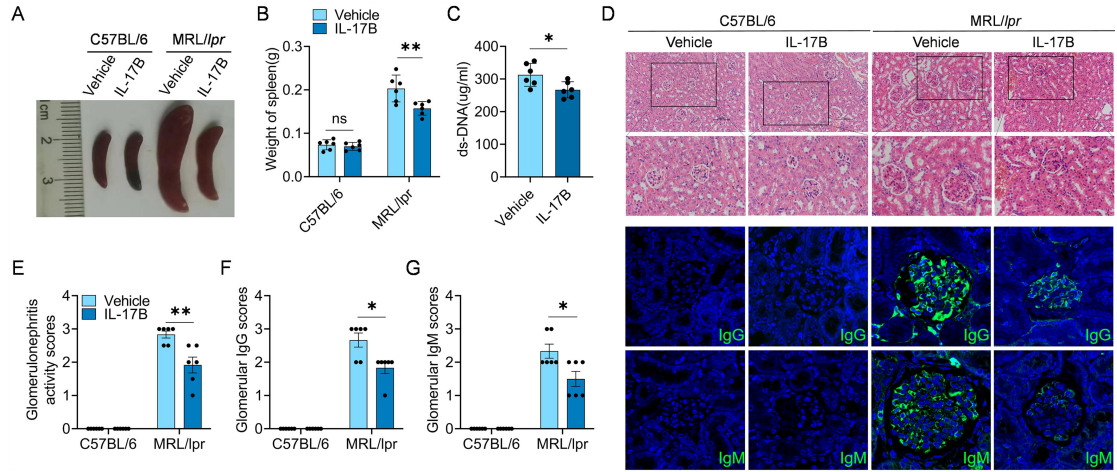

**Supplemental Figure 2. IL-17B inhibits disease progression in MRL/lpr mice.** (A) Splenic images, (B) spleen weights, (C) serum levels of anti-dsDNA antibodies, (D-G) H&E staining of kidney, and renal IgG and IgM deposition in MRL/lpr mice treated with vehicle or rmIL-17B. Scale bars represent 100  $\mu$ m. The data are shown as the means  $\pm$  SEM and are representative of three independent experiments (n=6 mice/group). \* $p$  < 0.05, \*\* $p$  < 0.01, ns denotes  $p$  > 0.05, and as determined by two-tailed Student's  $t$ -test or two-way ANOVA.

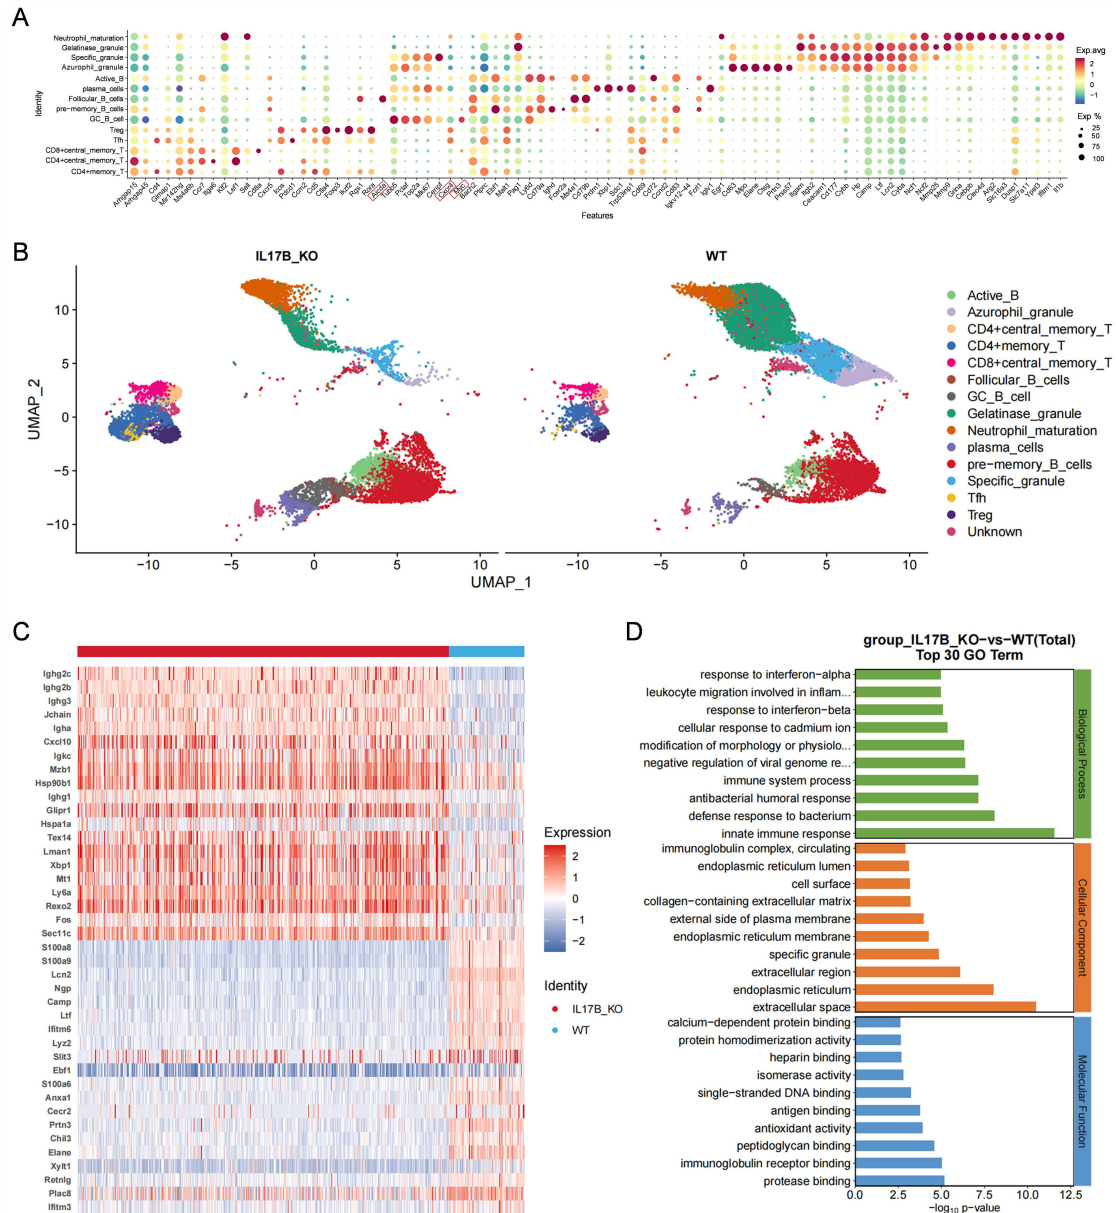

**Supplemental Figure 3. Single-cell RNA sequencing analysis of IMQ-treated wild-type mice and *IL-17B* KO mice. (A) Dot plots depict the mean expression level of a known marker within a specific cell cluster, with dot size reflecting the proportion of cells in each cluster expressing the gene. (B) UAMP plots of spleen cells from IMQ-treated wild-type mice (n=2) and *IL-17B* KO mice (n=2). (C) Heatmap and (D) GO analysis of spleen GC B cells from IMQ-treated wild-type mice and *IL-17B* KO mice.**

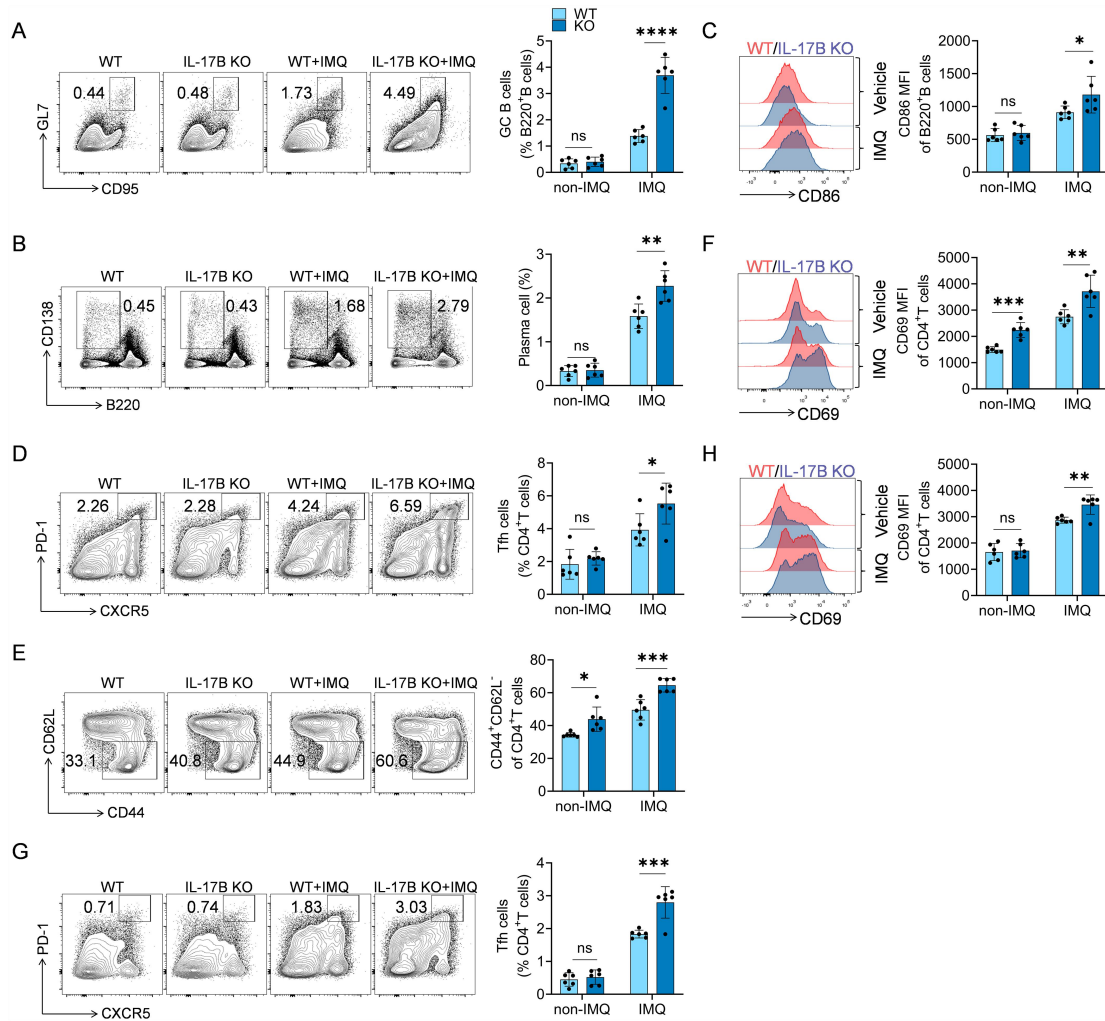

**Supplemental Figure 4. Deletion of IL-17B promotes the activation and differentiation of B cells and T cells from mLNs of IMQ-induced lupus-prone mice.** Representative flow cytometry images and statistical analysis of the percentage of (A) GC B cells, (B) plasma cells, and the expression of (C) CD86 on B220<sup>+</sup> B cells in mLNs of IMQ-treated wild-type or *IL-17B* KO mice. Representative flow cytometry images and statistical analysis of the percentage of (D) Tfh cells, (E) memory CD4<sup>+</sup> T cells and the expression of (F) CD69 on CD4<sup>+</sup> T cells in spleen and the percentage of (G) Tfh cells and the expression of (H) CD69 on CD4<sup>+</sup> T cells in the mLNs of IMQ-treated wild-type or *IL-17B* KO mice. The data are shown as the means  $\pm$  SEM and are representative of three independent experiments (n=6 mice/group). \* $p < 0.05$ , \*\* $p < 0.01$ , \*\*\* $p < 0.001$ , \*\*\*\* $p < 0.0001$ , ns denotes  $p > 0.05$ , and as determined by two-tailed Student's *t*-test.

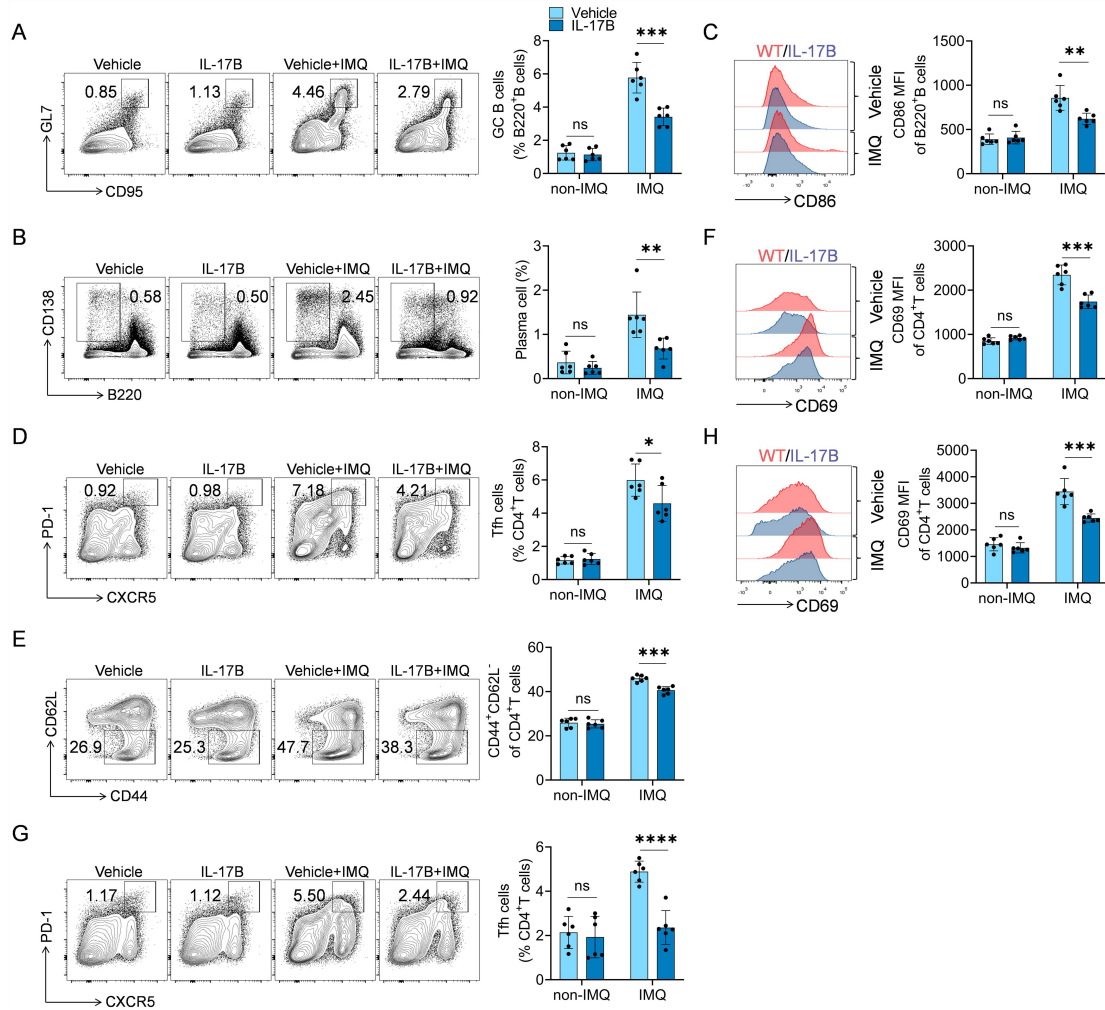

**Supplemental Figure 5. rmIL-17B inhibits the activation and differentiation of B cells and T cells.** Representative flow cytometry images and statistical analysis of the percentage of (A) GC B cells, (B) plasma cells, and the expression of (C) CD86 on B220<sup>+</sup> B cells in mLN of IMQ-induced wild-type mice treated with vehicle or rmIL-17B. Representative flow cytometry images and statistical analysis of the percentage of (D) Tfh cells, (E) memory CD4<sup>+</sup> T cells and the expression of (F) CD69 on CD4<sup>+</sup> T cells in spleen and the percentage of (G) Tfh cells and the expression of (H) CD69 on CD4<sup>+</sup> T cells in the mLN of IMQ-induced wild-type mice treated with vehicle or rmIL-17B. The data are shown as the means  $\pm$  SEM and are representative of three independent experiments (n=6 mice/group). \* $p < 0.05$ , \*\* $p < 0.01$ , \*\*\* $p < 0.001$ , \*\*\*\* $p < 0.0001$ , ns denotes  $p > 0.05$ , and as determined by two-tailed Student's *t*-test.

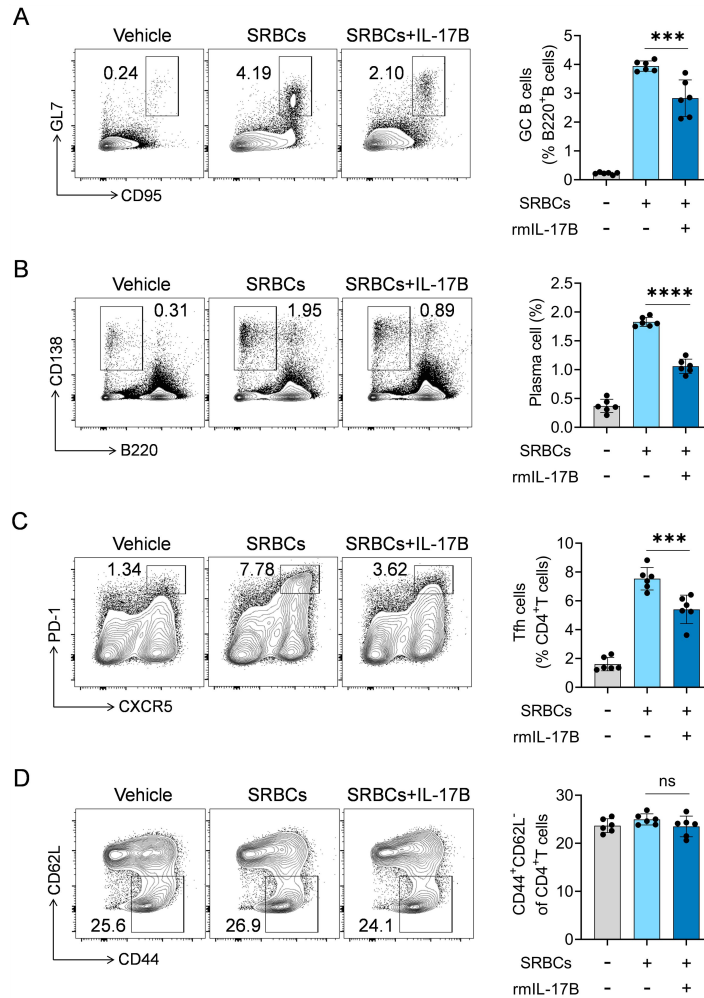

**Supplemental Figure 6. IL-17B inhibits the germinal center response induced by exogenous antigens.** Representative flow cytometry images and statistical analysis of the percentages of (A) spleen GC B cell, (B) plasma cells, (C) Tfh cells, (D) memory CD4<sup>+</sup> T cells in SRBCs-induced wild-type mice treated with vehicle or rmIL-17B. The data are shown as the means  $\pm$  SEM and are representative of three independent experiments (n=6 mice/group). \*\*\* $p < 0.001$ , \*\*\*\* $p < 0.0001$ , ns denotes  $p > 0.05$ , and as determined by one-way ANOVA.

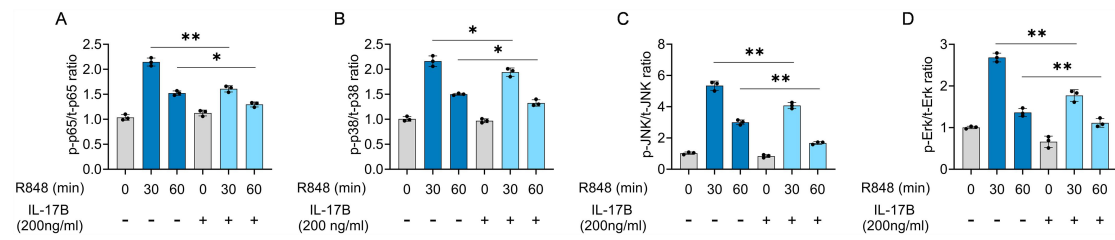

**Supplemental Figure 7. IL-17B reduces the phosphorylation levels of p65, p38, JNK, and Erk induced by R848.** Normalized quantification of phosphorylation levels of (A) p65, (B) p38, (C) JNK, and (D) Erk protein in Figure 3F. The data are shown as the means  $\pm$  SEM and are representative of three independent experiments. \* $p < 0.05$ , \*\* $p < 0.01$ , and as determined by two-way ANOVA.

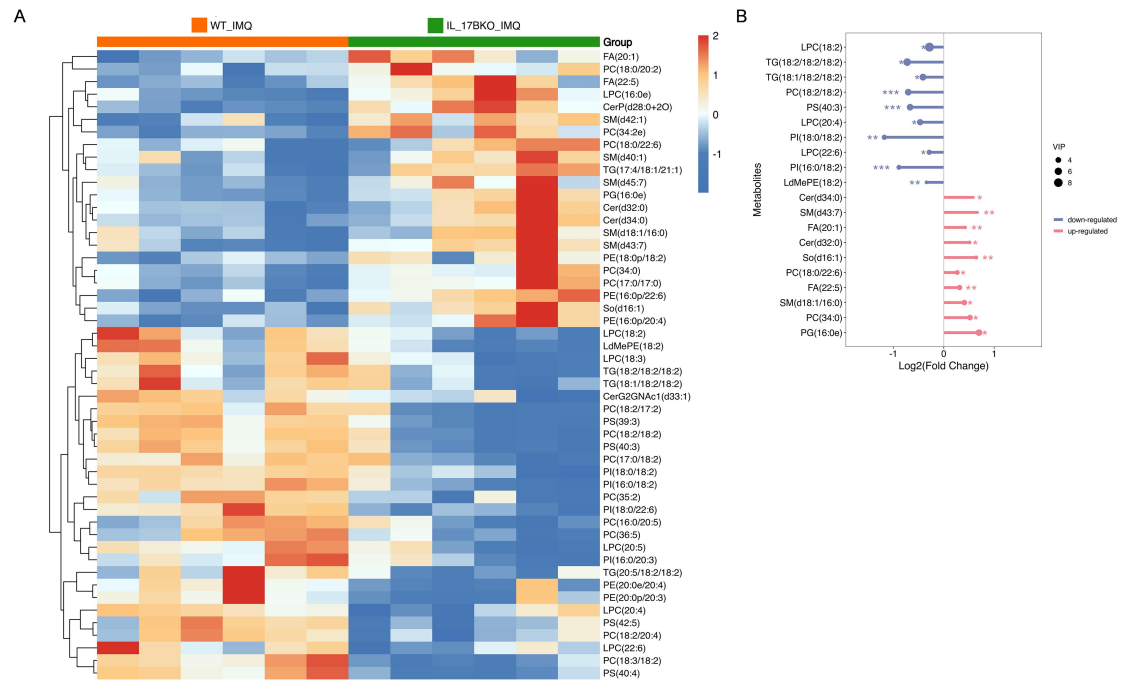

**Supplemental Figure 8. Liposome profiling of IMQ-treated wide-type and *IL-17B* KO mice.** (A) Heatmaps and (B) lollipop of metabolites from serum lipid profiles of IMQ-treated wild-type (n=6) and *IL-17B* KO mice (n=6).



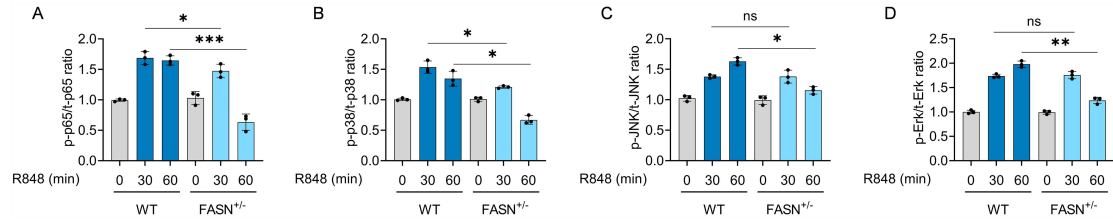

**Supplemental Figure 9. Absence of FASN reduces the phosphorylation levels of p65, p38, JNK, and Erk induced by R848.** Normalized quantification of phosphorylation levels of (A) p65, (B) p38, (C) JNK, and (D) Erk protein in Figure 4M. The data are shown as the means  $\pm$  SEM and are representative of three independent experiments. \* $p < 0.05$ , \*\* $p < 0.01$ , \*\*\* $p < 0.001$ , ns denotes  $p > 0.05$ , and as determined by two-way ANOVA.

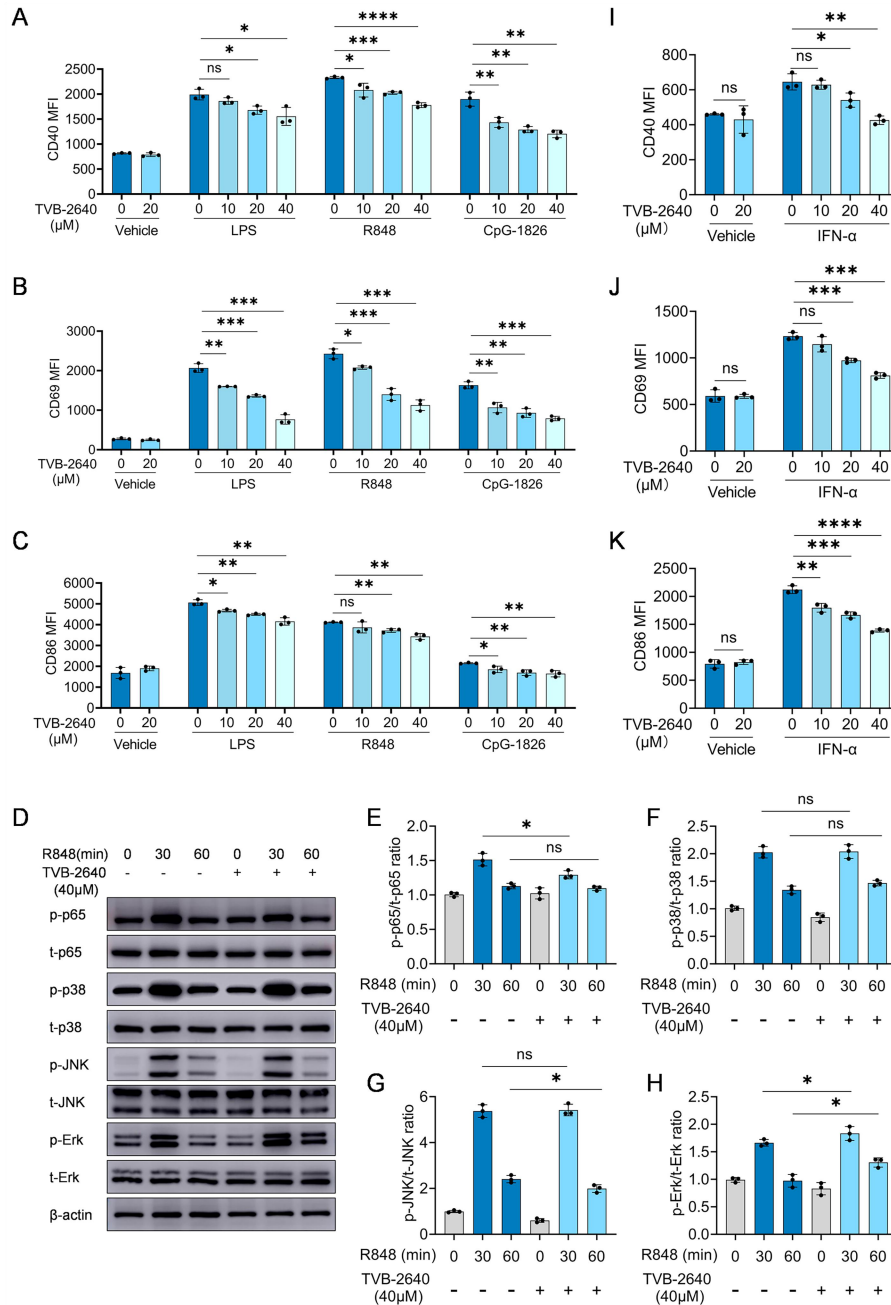

**Supplemental Figure 10. TVB-2640 suppresses TLR and IFN-I-induced B cell activation in vitro.** (A-H) Murine splenic naive B cells, pretreated with TVB-2640 for 3 hours, were stimulated with LPS (100 ng/ml), R848 (1 μg/ml) and CpG-1826 (1 μM). (A) CD40, (B) CD69 and (C) CD86 expression at 24 hours. (D-H) Western blot analysis was performed to assess the phosphorylation levels of p65, p38, JNK, and Erk at 30 or 60 minutes after R848 stimulation. (I-K) Murine splenic naive B cells, pretreated with TVB-2640 for 3 hours, were stimulated with IFN-α (1000 U/ml). (I) CD40, (J) CD69 and (K) CD86 expression at 24 hours. The data are shown as the means ± SEM and are representative of three independent experiments. \* $p < 0.05$ , \*\* $p < 0.01$ , \*\*\* $p < 0.001$ , \*\*\*\* $p < 0.0001$ , ns denotes  $p > 0.05$ , and as determined by one-way or two-way ANOVA.

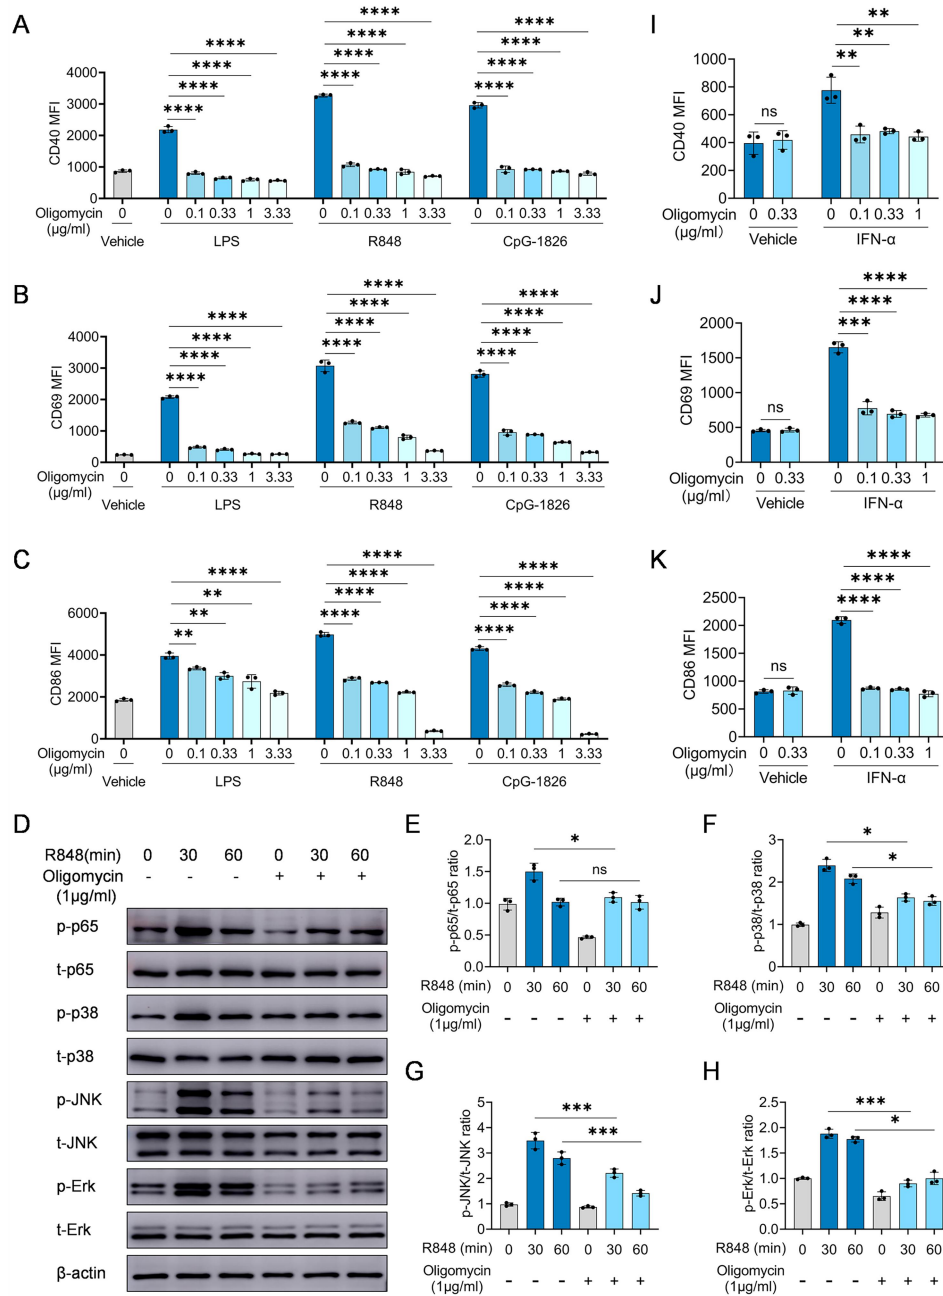

**Supplemental Figure 11. Oligomycin suppresses TLR and IFN-I-induced B cell activation in vitro.** (A-H) Murine splenic naive B cells, pretreated with Oligomycin for 2 hours, were stimulated with LPS (100 ng/ml), R848 (1 µg/ml) and CpG-1826 (1 µM). (A) CD40, (B) CD69 and (C) CD86 expression at 24 hours. (D-H) Western blot analysis was performed to assess the phosphorylation levels of p65, p38, JNK, and Erk at 30 or 60 minutes after R848 stimulation. (I-K) Murine splenic naive B cells, pretreated with Oligomycin for 2 hours, were stimulated with IFN-α (1000 U/ml). (I) CD40, (J) CD69 and (K) CD86 expression at 24 hours. The data are shown as the means ± SEM and are representative of three independent experiments. \* $p < 0.05$ , \*\* $p < 0.01$ , \*\*\* $p < 0.001$ , \*\*\*\* $p < 0.0001$ , ns denotes  $p > 0.05$ , and as determined by one-way or two-way ANOVA.

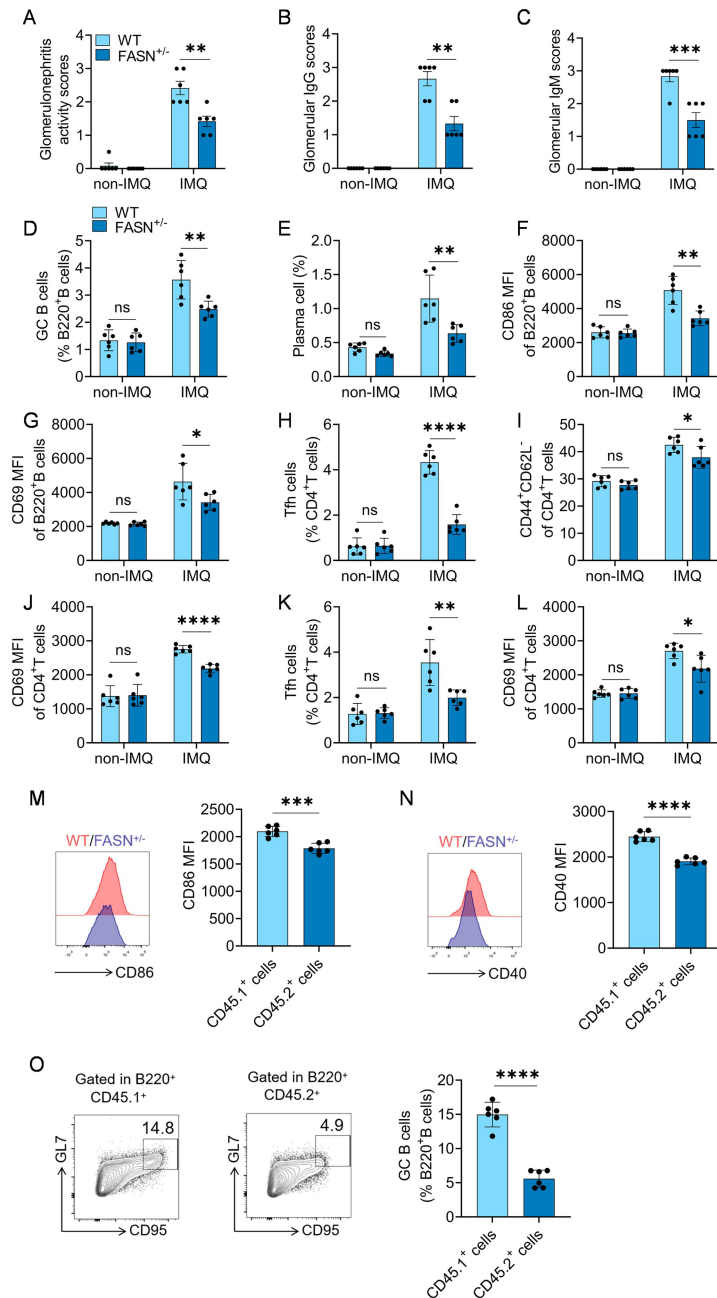

**Supplemental Figure 12. Absence of FASN inhibits the activation and differentiation of B cells.** (A) Glomerulonephritis activity scores, (B) glomerular IgG scores and (C) glomerular IgM scores in IMQ-treated wild-type or *FASN*<sup>+/-</sup> mice. The percentage of (D) GC B cells, (E) plasma cells and the expression of (F) CD86 and (G) CD69 on B220<sup>+</sup> B cells in mLNs and the percentage of (H) Tfh cells, (I) memory CD4<sup>+</sup> T cells and the expression of (J) CD69 on CD4<sup>+</sup> T cells in spleen of IMQ-treated wild-type or *FASN*<sup>+/-</sup> mice. The percentage of (K) Tfh cells and the expression of (L) CD69 on CD4<sup>+</sup> T cells in the mLNs of IMQ-treated wild-type or *FASN*<sup>+/-</sup> mice. The expression of (M) CD86 and (N) CD40 on the surface of CD45.1<sup>+</sup> B cells and CD45.2<sup>+</sup> B cells in the mLNs and the percentage of (O) GC B cells in CD45.1<sup>+</sup> B cells and CD45.2<sup>+</sup> B cells in the mLNs. The data are shown as the means ± SEM and are representative of three independent experiments (n=6 mice/group). \**p* <

0.05, \*\* $p < 0.01$ , \*\*\* $p < 0.001$ , \*\*\*\* $p < 0.0001$ , ns denotes  $p > 0.05$ , and as determined by two-tailed Student's  $t$ -test or two-way ANOVA.

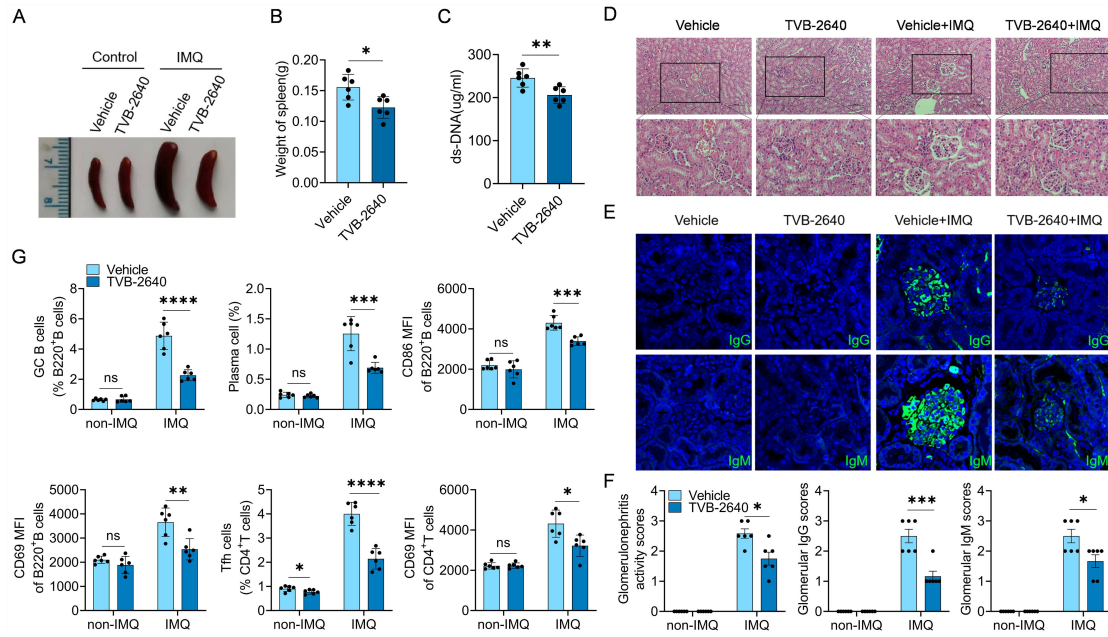

**Supplemental Figure 13. TVB-2640 alleviates the progression of IMQ-induced lupus in mice.** (A) Splenic images, (B) spleen weights, (C) serum levels of anti-dsDNA antibodies, (D-F) H&E staining of kidney, and renal IgG and IgM deposition in IMQ mice treated with vehicle or TVB-2640. (G) FACS analysis of the percentages of spleen GC B cells (B220<sup>+</sup>GL-7<sup>+</sup>CD95<sup>+</sup>), plasma cells (CD138<sup>+</sup>B220<sup>-</sup>), the expression of CD86 and CD69 on B220<sup>+</sup> B cells and percentage of Tfh cells (CD4<sup>+</sup>CXCR5<sup>+</sup>PD-1<sup>+</sup>) and the expression of CD69 on CD4<sup>+</sup> T cells in IMQ mice treated with vehicle or TVB-2640. The data are shown as the means  $\pm$  SEM and are representative of three independent experiments (n=6 mice/group). \* $p < 0.05$ , \*\* $p < 0.01$ , \*\*\* $p < 0.001$ , \*\*\*\* $p < 0.0001$ , ns denotes  $p > 0.05$ , and as determined by two-tailed Student's *t*-test or two-way ANOVA.

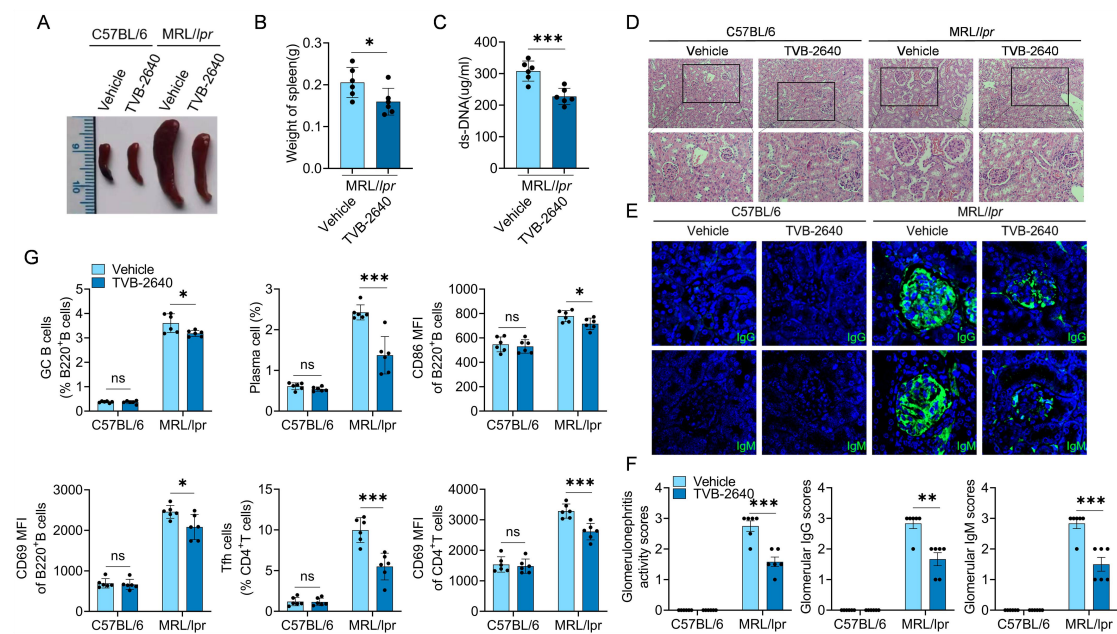

**Supplemental Figure 14. TVB-2640 alleviates the progression of MRL/lpr lupus in mice.** (A) Splenic images, (B) spleen weights, (C) serum levels of anti-dsDNA antibodies, (D-F) H&E staining of kidney, and renal IgG and IgM deposition in MRL/lpr mice treated with vehicle or TVB-2640. (G) FACS analysis of the percentages of spleen GC B cells, plasma cells, the expression of CD86 and CD69 on B220<sup>+</sup> B cells and percentage of Tfh cells and the expression of CD69 on CD4<sup>+</sup> T cells in MRL/lpr mice treated with vehicle or TVB-2640. The data are shown as the means ± SEM and are representative of three independent experiments (n=6 mice/group). \**p* < 0.05, \*\**p* < 0.01, \*\*\**p* < 0.001, \*\*\*\**p* < 0.0001, ns denotes *p* > 0.05, and as determined by two-tailed Student's *t*-test or two-way ANOVA.

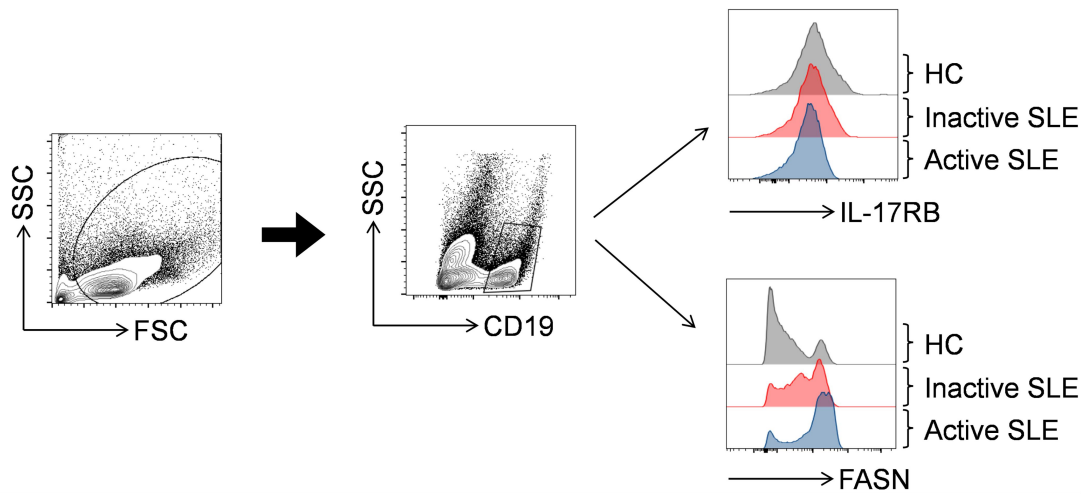

**Supplemental Figure 15. Gating strategy for flow cytometry in Figure 6.**



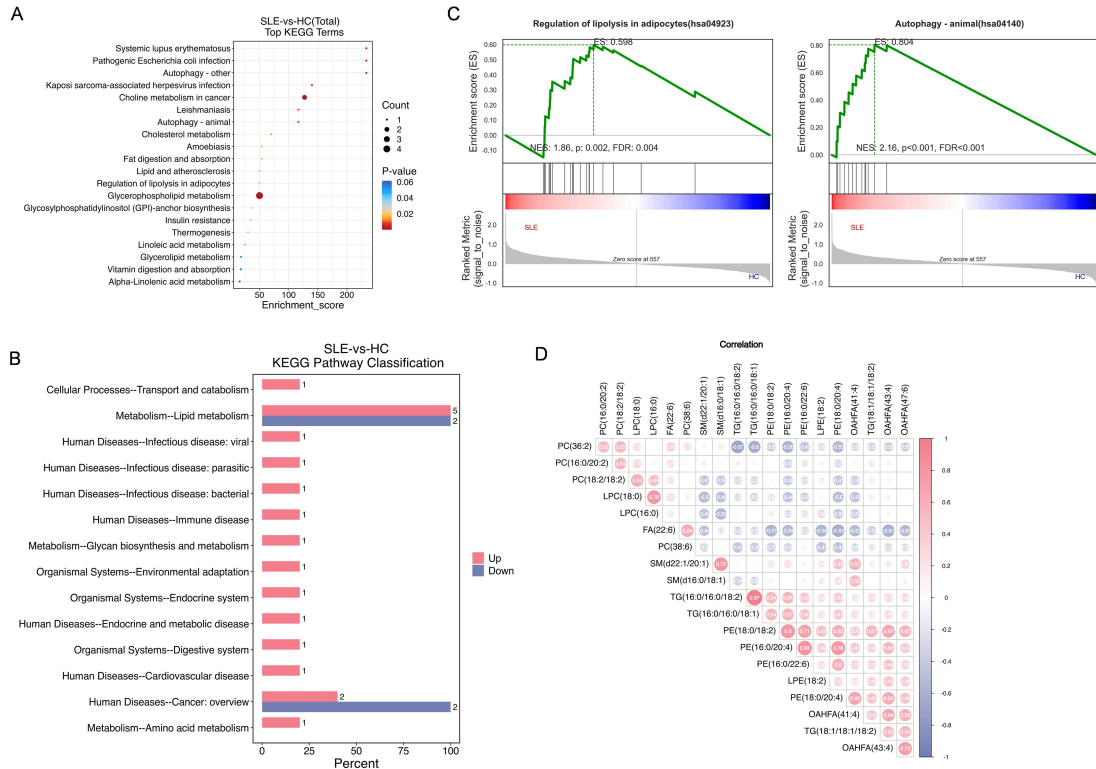

**Supplemental Figure 16. Liposome profiling of healthy controls and SLE patients. (A-B) KEGG analysis, (C) GESA and (D) correlation analysis of metabolites generated from peripheral blood serum lipid profiles in healthy individuals and SLE patients.**
